# Supplementary material for: Nutrient transport pathways in the Lower St. Lawrence Estuary: seasonal perspectives from winter observations
Source: Copernicus journal article supplement (doi:10.5194/os-2021-59), 2021-07-07
Supplement: Supplementary file [file os-2021-59-AC3-supplement.pdf]

## REFeree 3

*This manuscript offers a valuable contribution to understanding the physical processes that supply nitrate to the St Lawrence Estuary and provides a new seasonal aspect to the problem using a data set collected during the challenging winter months. The main conclusion is that rivers supply a more important fraction of nitrate to the lower estuary than previously thought - vertical fluxes from deep nutrient rich water only exceed fluvial sources during the summer.*

*Overall the work presented is of good quality and for the most part well written. Ultimately I would like to see it published. However, there are a number of improvements and corrections that I believe should be made before it is accepted, to both elevate the quality of the manuscript and make it as accessible as possible to a wide readership - to the benefit of both the author and journal.*

*My major comments concern (1) better framing of the paper, (2) a more substantial discussion that draws upon a more complete budgeting exercise and (3) the method of calculation of vertical nitrate fluxes.*

*Also, given the conclusions drawn here, I think the title of the paper could be a bit bolder and more informative.*

Thank you for your comments, we have responded to them in our responses below. The scope of our manuscript is the seasonality of the nutrient transported into the system via physical processes. Hence, we have not included a complete nitrate budget. Besides, we lack seasonal data on the nitrate cycling from published sources to complete such a budget. To avoid conjectures, we have opted to include average accumulation rates into the LSLE between summer and fall, and between fall and winter (Fig 8). As for the title, we have modified it to reflect that our perspectives on the main transport pathways of nutrients have changed because of the new winter observations.

### Major comments

*(1) The introduction to this paper could do a much better job of framing the work that follows and in identifying its unique contribution to the understanding of nitrate supply to the St Lawrence Estuary. The majority of the first paragraph for example is around access to the Canadian Coast Guard vessel, information that belongs in the Methods section. I would advise that you consider re-structuring the introduction using the following generic guidance:*

*Spell out what the importance (think global perspective) of the topic you are addressing is. i.e. why should we all care about nutrient budgets in estuaries Lay out (succinctly) what we already know Articulate what we don't know (or can't agree on), why this knowledge gap is important and what has prevented us from tackling it Tell the reader what this manuscript is offering to help address this gap Much of the necessary material for this is there, but not laid out in a way that makes the necessary impact and clearly sets the scene for the work that follows. With some re-writing therefore the introduction could be significantly improved.*

The introduction was modified by removing many sentences about the vessel. However, the paper does not aim to create a nitrate budget for the estuary. It quantifies the amount of nitrate being transported through

physical processes during winter, and revisits the notion that vertical mixing processes trumps contributions from horizontal advection. The introduction was re-organised to highlight the objective of the paper, which was hindered by the lack of winter observations, and lack of spatial coverage in the other season's observations. We also clarified the current debate from the various literature on the system.

*(2) In my opinion, the opportunity to present and discuss a (back of the envelope) nitrate budget for the lower St Lawrence estuary has not been fully exploited. Lines 296-307 discuss a nitrate inventory, yet this is not compared to the total supply rates that are calculated here and summarised in Figure 8c. This is a shame. For example, between fall 2017 and winter 2018 there was a 280 mmol m<sup>-2</sup> increase in depth integrated N within the lower estuary, which based on the 100 days between the surveys (and 6000 km<sup>2</sup> area) would have required a minimum supply rate of 195 mol s<sup>-1</sup> (final paragraph of section 4.2). Based on the riverine (350 mol s<sup>-1</sup>), tidal nutrient pump (6 mol s<sup>-1</sup>) and shear within the LSLE (14 mol s<sup>-1</sup>) that are calculated in this paper (total = 370 mol s<sup>-1</sup>), and assuming that this is reflective of the period between the fall and winter surveys, approx. 175 mol s<sup>-1</sup> of nitrate must have been lost from the LSLE during the same period. What processes (biological and physical) could account for this, e.g. estimated export out of the LSLE given typical velocities in the surface layer?*

An earlier draft included a brief overview of the budget, which we removed because of the lack of winter observations for the other processes (remineralisation, sedimentation, etc). We have decided nonetheless to add the nitrate accumulation rate of 195 mol/s between fall and winter on Figure 8. We have modified the summary figure (8) to highlight the tidal phase at which we measured the vertical fluxes during winter. We had already discussed at great length that the tidal-averaged flux for winter may be as large as those observed in summer. Thus, it's possible that the total winter nitrate inputs are larger than the 370 mol/s estimated by the reviewer. The net loss could thus be larger than 175 mol/s.

We do not have sufficient information (either published, government, tidally-resolved data) for estimating the advection (export) losses from the LSLE. For argument sake, we can presume that the nitrate export in the surface layer is larger during winter than in summer. *Sinclair et al.* (1976) repeated nitrate transects near Rimouski (roughly mid-way in the Lower Estuary) between May and September. They estimated a minimum net export of  $7.4 \pm 1.8$  mol/s in August (late summer) and a maximum of  $105 \pm 25$  mol/s in May (top 50 m of the water column). It's possible that the net advective export is higher during winter than their  $105 \pm 25$  mol/s estimated in May, but unlikely given the weaker net flows near the surface in winter than in spring. We cannot say for sure though, so we have not updated the discussion.

As for biological uptake through photosynthesis, we can extrapolate the uptake experiments of *Villeneuve* (2020) to the entire LSLE. This extrapolation yields a photosynthesis uptake of approx 100 to 120 mol/s during winter, and much higher in summer. We have not commented on the proportion of the winter net loss that is due to physical vs biological processes because of the above stated uncertainties. Crudely, the biological uptake and horizontal advective loss are of the same order of magnitude ( $\sim 100$  mol/s each).

*A similar calculation could be performed for the period between summer and fall 2017, albeit relying on summer fluxes reported in Cyr et al. 2015. Given that the total supply in the summer of 313 mol s<sup>-1</sup> (river + tidal nutrient pump + shear in Figure 8c) is not hugely dissimilar to the winter (although the balance between sources has shifted) and that (by eye from Figure 5) it looks like the summer to fall increase in depth integrated N might be smaller, biological uptake may be playing a more important role (unsurprisingly). Reconciling that (roughly) with published uptake rates would nicely round off your story and improve the discussion section.*

We have added the accumulation of nitrate between summer and fall into the summary Figure 8 and text [L302-304], which we calculated from Fig 5. This spatially-averaged accumulation rate was approx 95 mol/s in the upper 75-m, so indeed smaller than 195 mol/s between fall and winter. Given the total summer supply of 313 mol/s through physical transport processes (which could be higher during spring tides as mentioned by Cyr *et al.* (2015)), we get an approximate net loss of 218 mol/s. We suspect that the export (loss) via horizontal advection was low given the low surface nitrate concentrations and the low exports (<10 mol/s) estimated by Sinclair *et al.* (1976) during late summer.

We have very little information about uptake rates during summer. Experiments by Villeneuve (2020), if extrapolated to the entire Lower Estuary (upper 75-m, which might be too deep in summer), indicate that the net loss could be attributed entirely to a loss via photosynthesis uptake. Our net loss of 218 mol/s is small compared to published values from biogeochemical box models (e.g., Jutras *et al.*, 2020; Savenkoff *et al.*, 2001). However, published biogeochemical models for summer yield vastly different estimates for the nitrate inputs via vertical mixing processes than those we observed. Some even use very large fluvial inputs (4x larger than the late summer estimates) to force their model. Hence, we prefer discussing only deviations in the nitrate inputs from physical processes among studies, rather than comment on the other nitrate sinks/sources.

*(a few more comments on lines 295-307 can be found below)*

*(3) Given the care that is taken to establish nitrate-salinity relationships and therefore accurate nitrate gradients, I am left a little unsatisfied that the vertical fluxes of nitrate have seemingly been taken at a fixed depth (e.g. 2.4 nmol m<sup>-2</sup> s<sup>-1</sup> at 80 m depth – line 356), as opposed to calculated on an isopycnal representative of the base of the surface layer. In a system that experiences considerable isopycnal heave this would be a much more robust approach.*

The fluxes in the Lower Estuary (outside of the HLC) were taken at the base of the subsurface nitrate minima which coincides with strong gradients of nitrate (Fig 7). The elevated fluxes occur at this depth (Fig 7f), hence our choice. This value sits at the 26.5 kg/m<sup>3</sup> isopycnal, which is located at 80±5 m for stations downstream of L0 (outside of the head). These elevated fluxes are representative of the dynamics in the system. We have updated L354-356 to indicate the isopycnal that corresponds to the 80-m depth.

### **Specific and more minor comments**

*Line 31 (and others throughout the whole manuscript). Use of the term 'upwelling' doesn't seem quite right here and is a bit mis-leading. My understanding is that oscillatory barotropic tidal currents heave isopycnals and nitrate isopleths up and down the face of the sill at the head of the channel. Turbulence generated over the sill (via e.g. internal wave generation/dissipation, hydraulic jumps, Kelvin-Helmholtz instabilities, bottom friction...) then enables nitrate from the deep pool to be (irreversibly) mixed into the surface water. Cyr *et al.* (2015) uses the term tidal pump, which would be a good replacement for 'upwelling'.*

We used the term tidal-upwelling to describe the vertical transport of material associated with the tides. The dome observable from the salt and nitrate transects (Fig. 3 and 5) highlights that deep water was being upwelled. To avoid confusion with wind-driven upwelling, we have replaced most instances of “tidal-upwelling” with “tidal-induced mixing”.

*Line 34. 'Entrainment of deep nutrient-rich water from estuarine circulation...' This is associated with shear-induced mixing that results from the estuarine circulation (and I presume also related to the propagation of internal waves?). In the re-working of the introduction, it would be good to provide a clearer mechanistic description of these processes.*

Yes, this sentence refers to entrainment from shear-induced mixing at the interfaces of water layers even though internal waves may be present elsewhere in the Lower Estuary (e.g., wind can generate internal waves). We have included a reference to internal waves in the previous sentence, and removed most instances of "estuarine circulation" in the introduction. The intent here was to list the different physical processes, which are discussed further in Section §2.1 (site description).

*Line 43. Vertical nitrate fluxes in the Mauritanian upwelling region are the highest ever reported then? If so, it would be good to make this more explicit in this sentence.*

This line was updated to highlight that the summer estimates were compared to the tabulated vertical nitrate fluxes of Cyr *et al.* (2015) from numerous studies around the world. The Mauritanian is well known for its productivity [L36-38], and its fluxes are very large but not the largest in the world which is why we did not state this in the text.

*Line 45. Please make clear what process the 33 and 400 mol s<sup>-1</sup> refers to.*

This sentence re-states Cyr *et al.* (2015) summer estimates of nutrient fluxes. We have reworded since this sentence since it represents their observed range nitrate transported from vertical mixing processes in the LSLE [L40].

*Figure 1. Although the stations are marked with 'U.' and 'L.', The Upper- and Lower-St Laurence Estuary could be a little more clearly marked.*

We have now labelled the Upper and Lower Estuary in Figure 1b.

*I understand the need for acronyms, but from a readability point of view, especially for those not so familiar with the area, you may like to consider cutting down on the use of HLC, LSLE and USLE, particularly early on in the manuscript. I do not suggest removing the acronyms all together, but a more blended approach might be helpful. Replacing LSLE and USLE with 'Lower-' and 'Upper-estuary' would work fine in a lot of instances (also HLC with head of the channel) and make the manuscript much easier to read.*

Agreed, we have replaced all in-text instances of LSLE and USLE to Lower and Upper Estuary, respectively. We have also reduced the use of HLC for denoting the head of the Laurentian channel by referring it to the "head" of the "head of the channel".

*Line 75. 'The magnitude and impact of this nutrient transport process on primary production across the whole LSLE and Gulf system is debated'. Can you be a bit more explicit about what is in debate here – material more for the introduction. (ps. this is an instance where you might like to consider writing Lower St Laurence Estuary in full, rather than the acronym).*

This statement refers to the debate of whether the vertical mixing processes dominate the nutrient supply into the Lower Estuary, and more specifically the importance of the intense tidally-induced mixing at the head relative to the vertical mixing elsewhere in the estuary. We have re-written the sentence accordingly and moved it to the introduction, while another sentence was added to highlight that previous observations have focused on mostly on vertical transport processes rather than the fluvial loads [L28-31].

*Line 166. Is this the right way around? Do you instead mean that the nitrate supply at Quebec City is representative of what reaches the Lower estuary?*

Indeed, we meant the downstream end of the Upper Estuary or the upstream end of the Lower Estuary, but not the upstream end of the Upper Estuary. We have corrected this typo.

*Liner 185. More specifically the 'mixing rate K' is the vertical eddy diffusivity.*

We used the term mixing rate to denote the diapycnal mixing rates  $K$ , which is the same word used in the subsection heading.

*Figure 4. Might be helpful to include vertical lines (at least in panel f) that mark 31.2 and 31.9 psu.*

We have added dotted vertical lines in panel (f) of Figure 4.

*Line 264-265. 'Exaggerate'? This isn't especially well articulated. Please can you re-word. You mean upscale the vertical nitrate fluxes observed within the HLC based on an area of 200 km<sup>2</sup>.*

We re-stated that this 200 km<sup>2</sup> is larger than the 100 km<sup>2</sup> value used by the summer study of Cyr *et al.* (2015). Hence, using the largest area exaggerates the impact of the vertical fluxes.

*Line 273. Do you really mean Figure 4b?*

No. Thanks for pointing out this typo created when we re-organised these panels. We have now rechecked all references to sub-panels.

*Line 279. Figure 5. Small detail, but you might want to consider re-ordering the panels in Figure 5 so that they are referred to in order throughout the manuscript. It would be worth checking that this is also the case for other multi-panel figures.*

The sub-panels were placed in their respective locations to make the figures more intuitive, or to optimise the use of existing axes. We have left the panels as is.

*Line 282. Figure 4a isn't the nitrate-salinity diagram. Do you mean Figure 4f?*

Indeed. This statement refers to panel f, and this typo has now been rectified.

*Lines 296-307. As alluded to above, I think that this is material for the discussion section and is not yet used to full effect. Further to the suggestions above I'd emphasise the need to provide indicators of the magnitude of potential biological source and sink terms, e.g. what might remineralisation of organic matter over these months contribute?*

We are unaware of winter observations about these biological terms, so prefer avoiding conjectures about their magnitudes. Current studies for summer either prescribe fluvial inputs that are representative of spring (e.g., Jutras et al., 2020), or predict unrealistic contributions from vertical mixing processes. Our paper thus focuses on improving the magnitude of these physical input terms as stated at the end of our introduction.

*Line 304 – it would be worth re-stating the area over which the averaging was performed. Also, state the seasons you are referring to with the statement 'between these two seasons' – it is rather inferred, but not crystal clear.*

We added the Lower Estuary to identify the region over which the data was spatially-averaged [L300]. We also brought the words "between fall and winter" to the beginning of the sentence rather than having the seasons specified at the end of the sentence.

*Query use of term 'load' in some contexts, e.g. line 306-307– is 195 mol s<sup>-1</sup> not a supply rate?*

The word 'load' refers to a mass input of a substance as opposed to a concentration, and is a common term in engineering and water quality. Here, we converted them into moles as opposed to mass in grams. We thus retain the term loads for inputs of nutrients.

*Line 322. I presume (based on the following sentence) that the 350 mol s<sup>-1</sup> is for February 2018 - but this needs making clearer.*

We added the words February 2018 to this sentence as referenced in the previous sentences.

*Line 334. Looking at Figure 7e (yellow profile) I'd say that K exceeded 10-4 m<sup>2</sup> s<sup>-1</sup> throughout the lower half of the water column, but not across 'most' of it. The upper 60 m is notably less than 10-4 m<sup>2</sup> s<sup>-1</sup>.*

This sentence was re-phrased to provide the depth range over which this statement is true i.e., below 60-m and above 30-m depth of the water column.

*Line 339-340. Can you be clearer as to which estimates of K might have been higher if collected at high tide – those in Cyr et al. 2015 or your own? From Fig 2 I thought that VMP profiles at L0 were collected at high water?*



The sentence now states on L335 "our winter fluxes", which we collected 2 h before high tide at Rimouski (not at high tide). This information was shown in Fig 2, albeit the entire two-week tidal signal was illustrated. We had also plotted the timing of our winter fluxes relative to the tidal phase in Figure 8.

*Line 344-346. The calculation here is of the vertical flux across a 200 km<sup>2</sup> area, assumed to be representative of the HLC - the assumption then is that this N supply is distributed across the whole LSLE – a much wider area downstream. The sentence needs re-wording to better articulate this (if this is indeed what is meant). This is the vertical flux associated with the processes operative at the head of the channel – i.e. tidal pumping.*

The sentence has been simplified on L343-344 since it converts the vertical fluxes of nitrate at the head of the channel to a net transport at the head. We have assumed the fluxes measured at the head are representative of the 200 km<sup>2</sup> at the head. This flux is not representative of the fluxes elsewhere in the LSLE.

*Figure 8 – panel (c) should be placed below (a) and (b)*

We modified the panel locations in Figure 8 as suggested.

*Please thoroughly check all the references. There are multiple examples of where the Journal name and/or article doi is missing.*

Missing doi and acronyms of journal names were fixed.

*Line 73. 'milder inflow'. You mean 'weaker'? 'Milder' is a slightly odd word to use here.*

Indeed. The word milder was replaced with weaker.

*Line 75. Full stop after 'becomes saltier'.*

We have added the missing stop after saltier.

*Line 96. '...and nutrient concentrations...'*

It's unclear what this comment refers to. These lines discuss the CTDs used aboard the ship.

*Line 106 (and others). Super and subscripts for NO<sub>3</sub>- etc*

These sub/superscripts have been fixed.

*Line 241 – 'concentrations FROM the vmp...'*

It's not clear what the reviewer is alluding to with this comment. The word vmp is not in these sentences, and no concentrations are being measured by this instrument.

*Line 269. First sentence needs re-wording.*

This sentence was shortened to introduce the paragraph [L266].

*Line 291. This sentence doesn't end very clearly. Can you re-word slightly to make clearer that you mean that nitrate uptake in surface waters during the summer is higher than during winter and fall.*

We have amended this sentence to focus on the higher uptake during summer rather than the reduced uptake during fall and winter [L286-288].



## REFERENCES

- Cyr, F., D. Bourgault, P. S. Galbraith, and M. Gosselin (2015), Turbulent nitrate fluxes in the Lower St. Lawrence Estuary, Canada, *J. Geophys. Res. Oceans*, 120(3), 2308–2330, doi:10.1002/2014JC010272.
- Jutras, M., A. Mucci, B. Sundby, Y. Gratton, and S. Katsev (2020), Nutrient cycling in the lower st. lawrence estuary: Response to environmental perturbations, *Estuarine Coastal Shelf Sci.*, 239, 106,715, doi:https://doi.org/10.1016/j.ecss.2020.106715.
- Mouriño-Carballido, B., et al. (2021), Magnitude of nitrate turbulent diffusion in contrasting marine environments, *Sci. Rep.*, 11(1), 18,804, doi:10.1038/s41598-021-97731-4.
- Savenkoff, C., A. F. Vézina, P. C. Smith, and G. Han (2001), Summer transports of nutrients in the Gulf of St. Lawrence estimated by inverse modeling, *Estuarine, Coastal and Shelf Science*, 52, 565–587, doi:10.1006/ecss.2001.0774.
- Sinclair, M., M. El-Sabh, and J.-R. Brindle (1976), Seaward nutrient transport in the lower St. Lawrence Estuary, *Journal of the Fisheries Research Board of Canada*, 33, 1271–1277, doi:10.1139/f76-163.
- Villeneuve, V. (2020), Caract risation des variations saisonni re et spatiale des  l ments nutritifs et de la prise de l’azote dissous dans l’estuaire du fleuve saint-laurent, MSc thesis, Universit  Laval.
